# Supplementary material for: QTL‐seq identifies BnaFT.A02 and BnaFLC.A02 as candidates for variation in vernalization requirement and response in winter oilseed rape (Brassica napus)
Source: PubMed Central journal article supplement (PMC7680531; doi:10.1111/pbi.13421), 2020-06-23

Figure S1

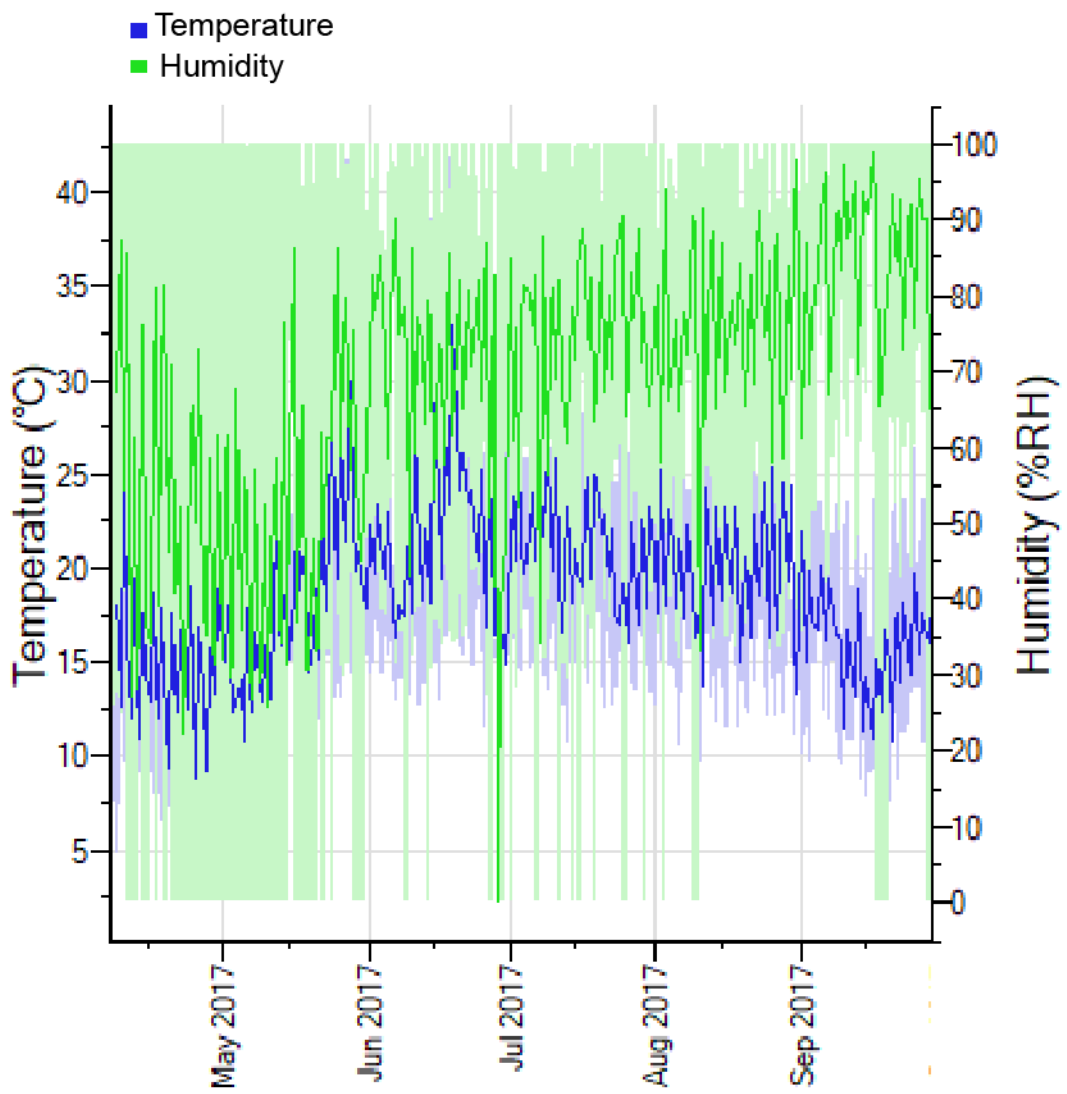

Figure S2

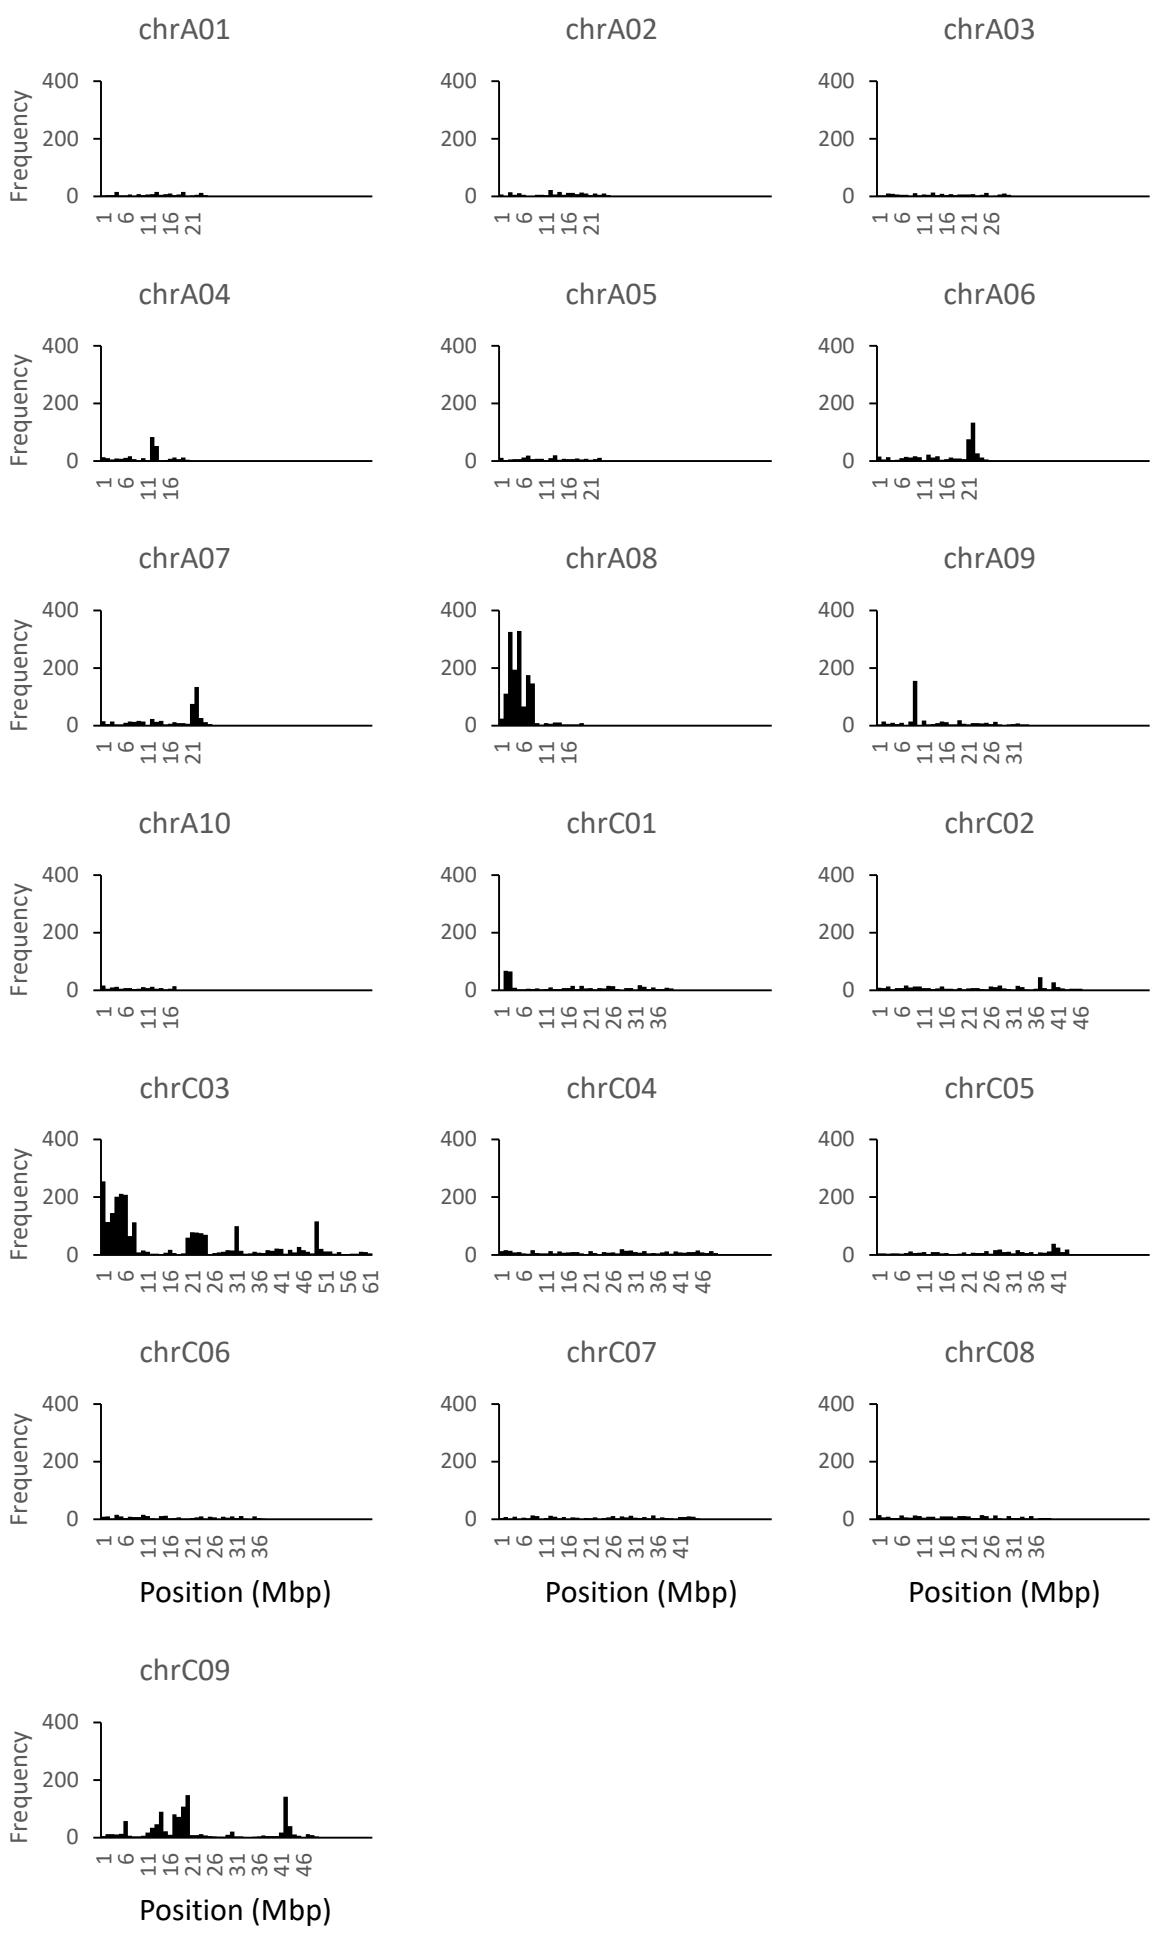

Figure S3

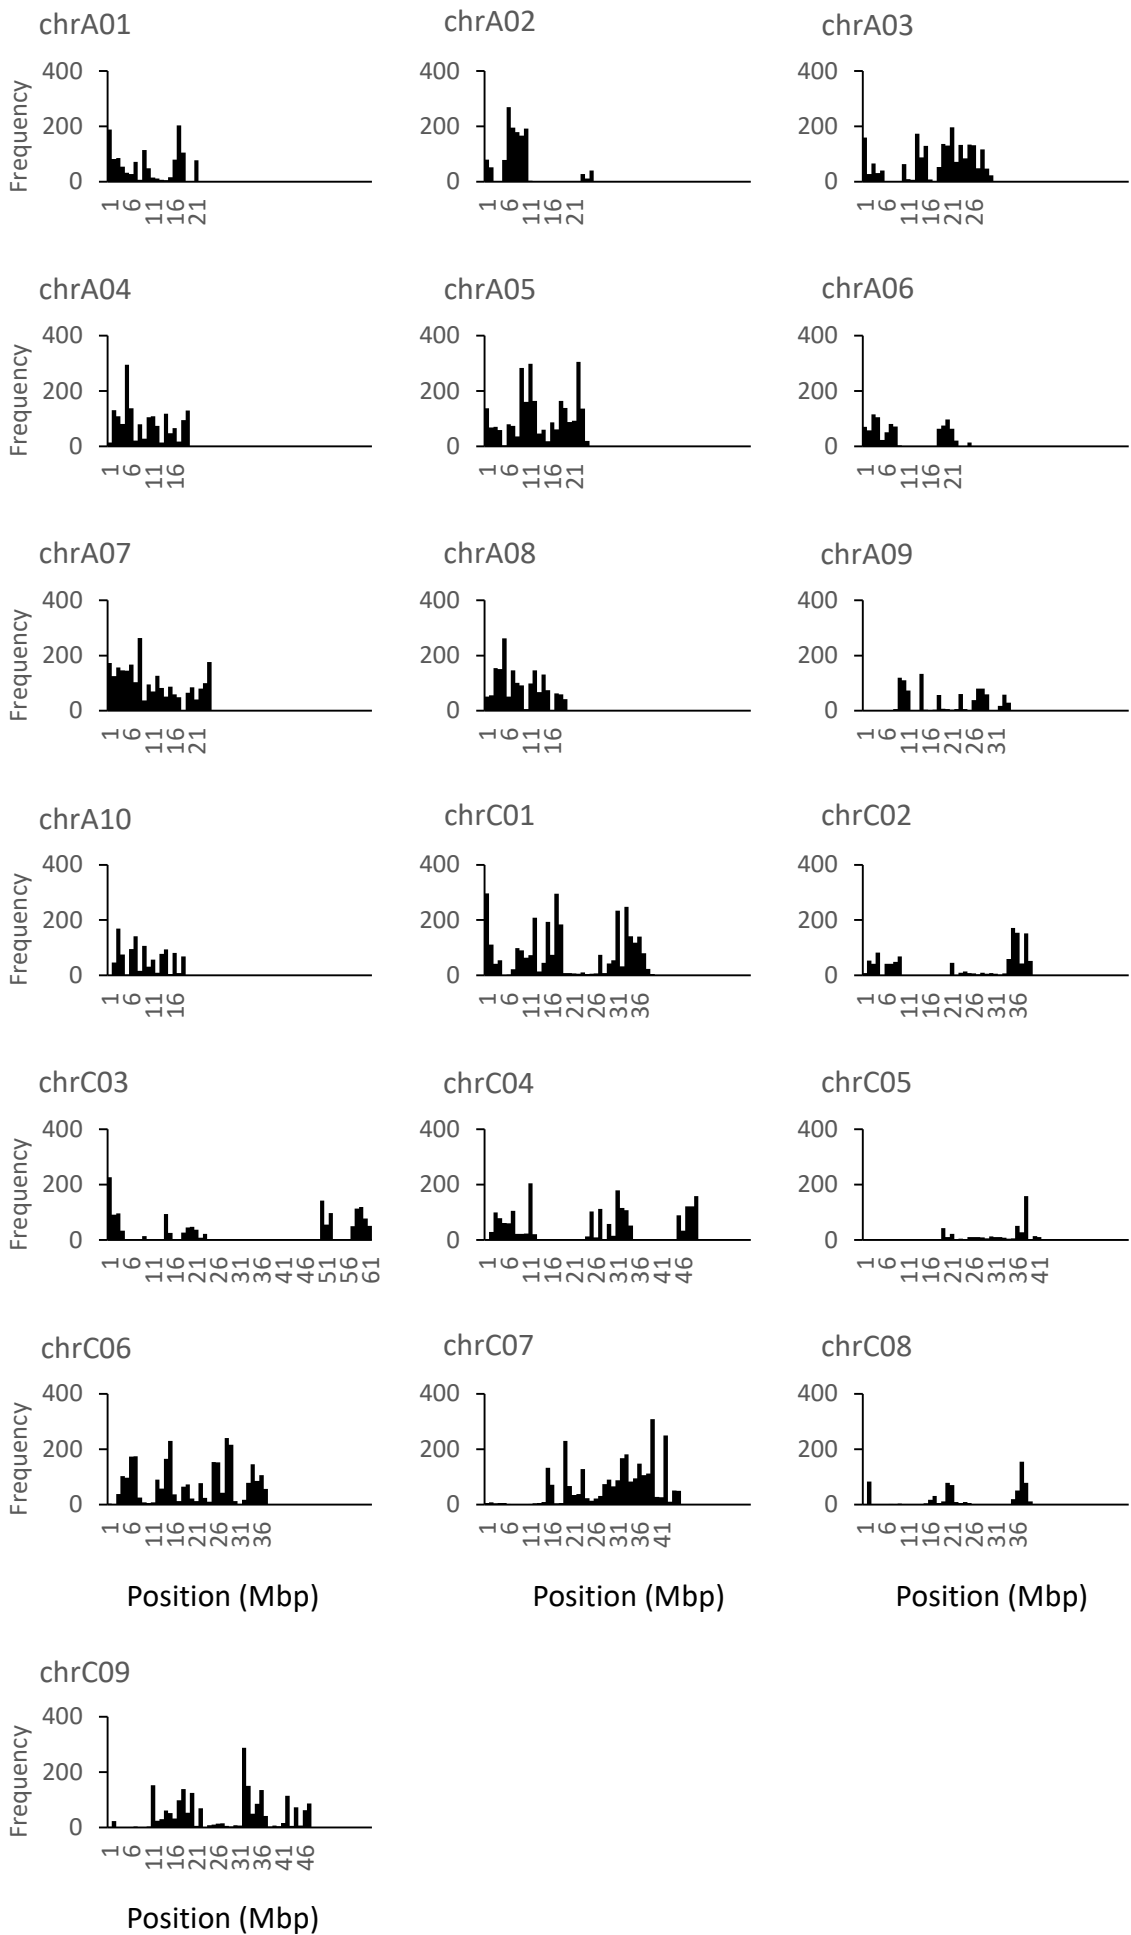

Figure S4

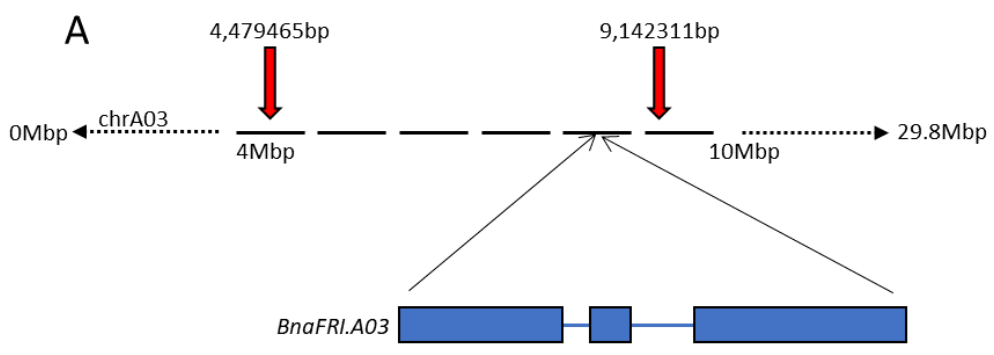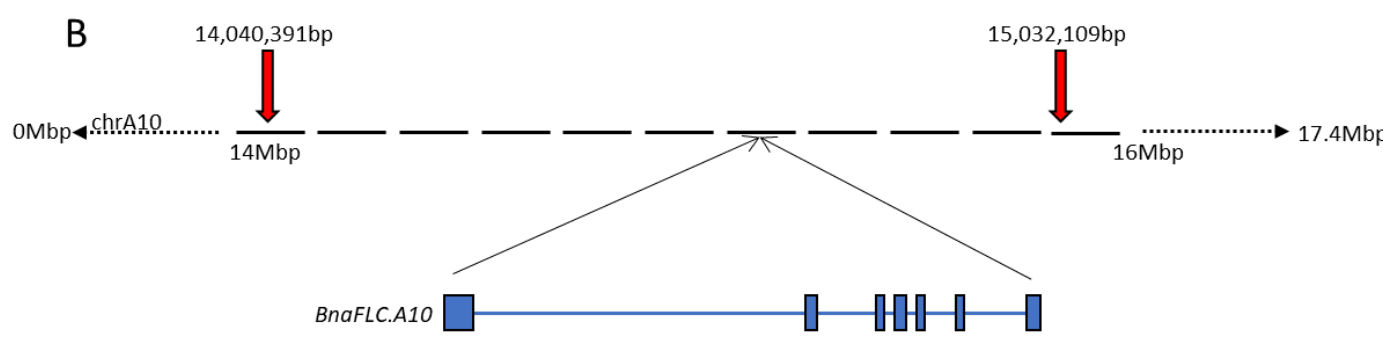

Figure S5

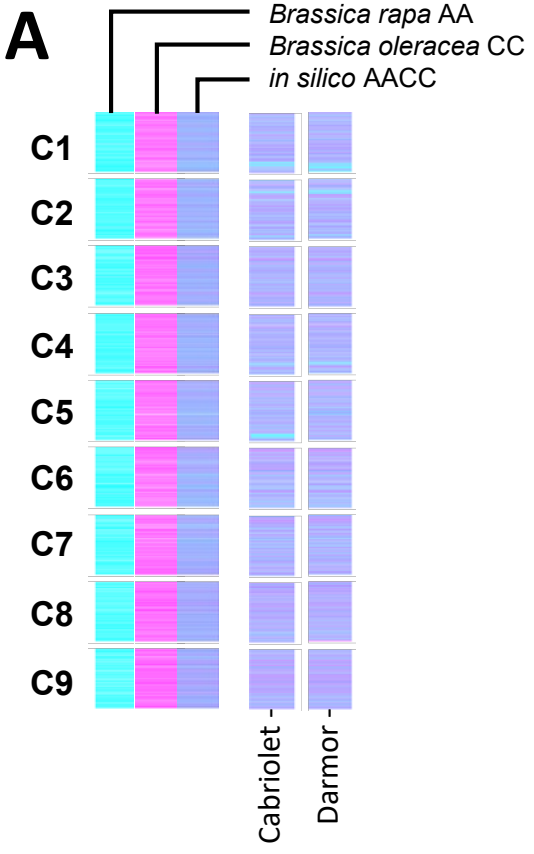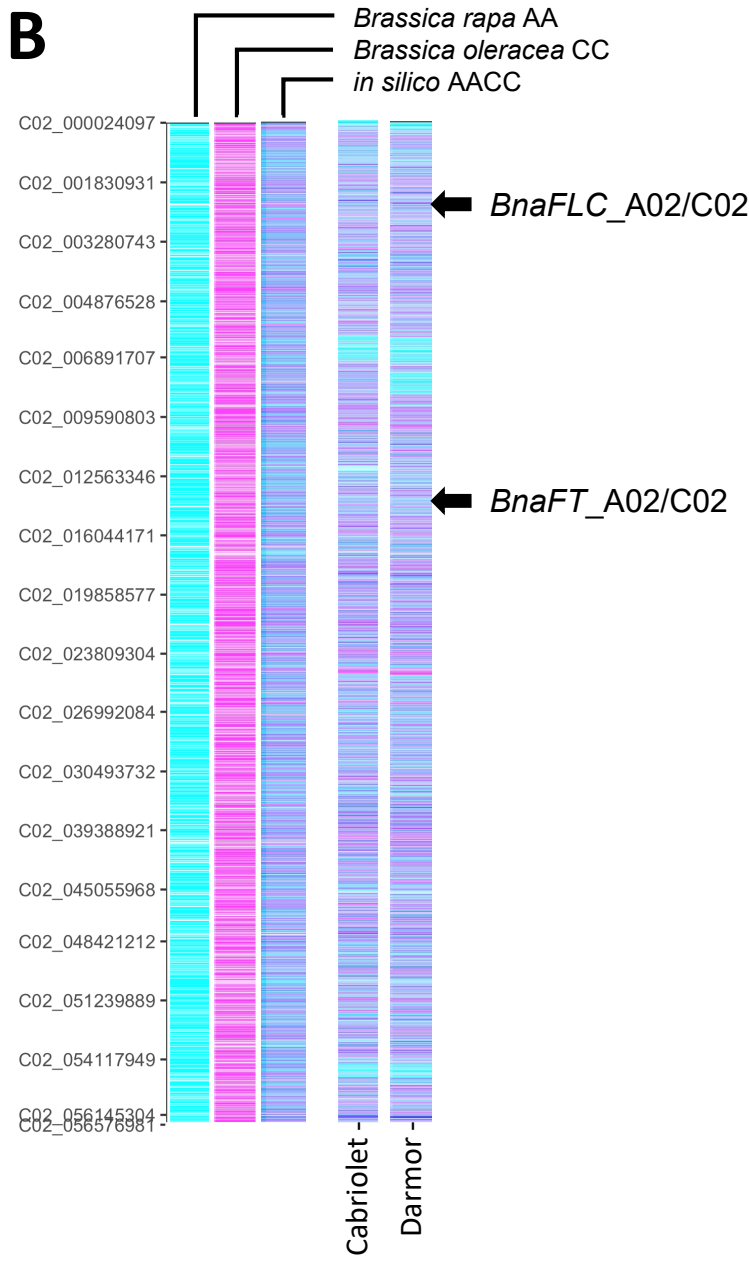

Figure S6

**A**

BnaFLC.A02-Dar/BnaFT.A02-Dar

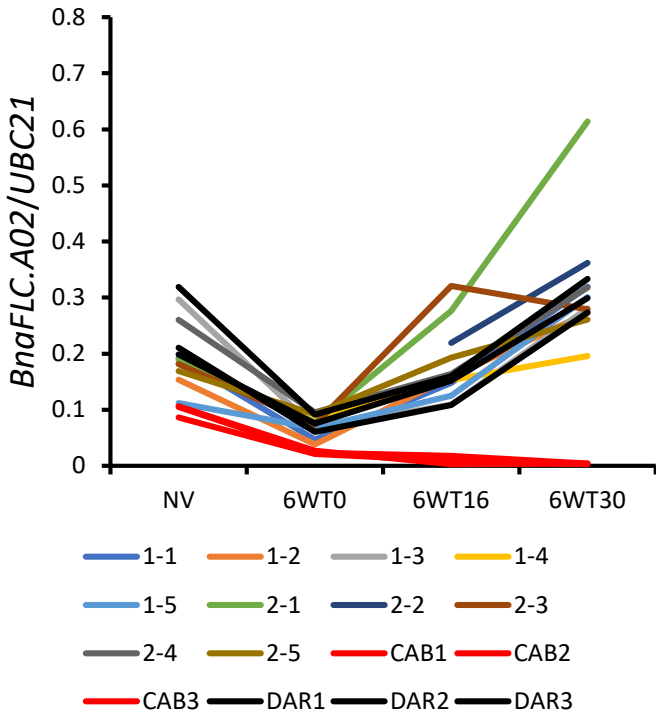

**B**

BnaFLC.A02-Dar/BnaFT.A02-Cab

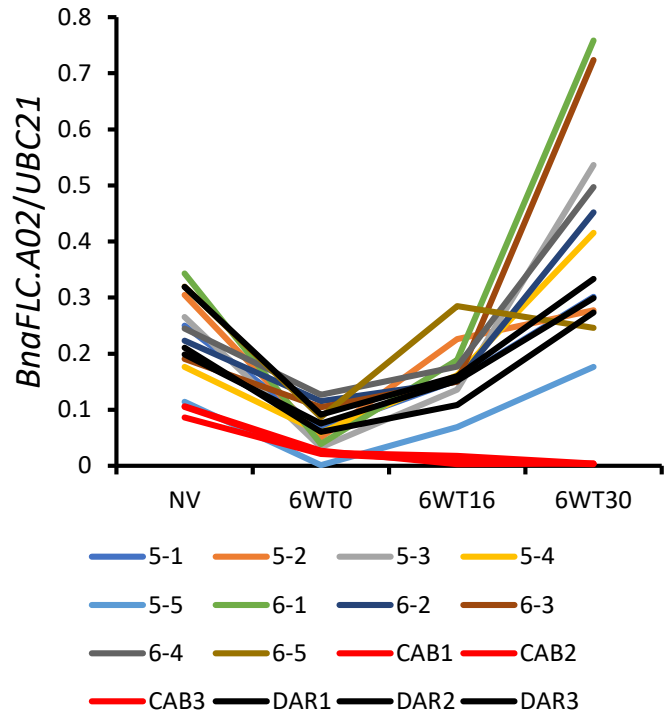

**C**

BnaFLC.A02-Cab/BnaFT.A02-Dar

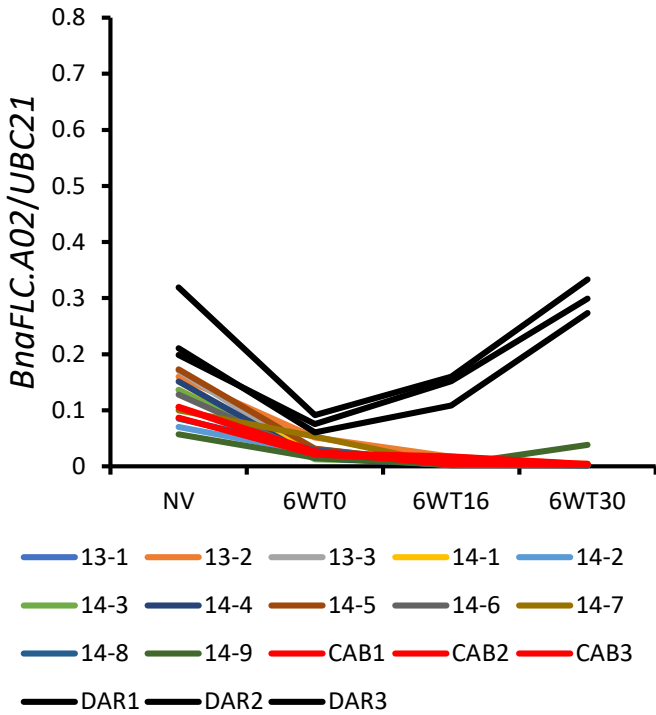

**D**

BnaFLC.A02-Cab/BnaFT.A02-Cab

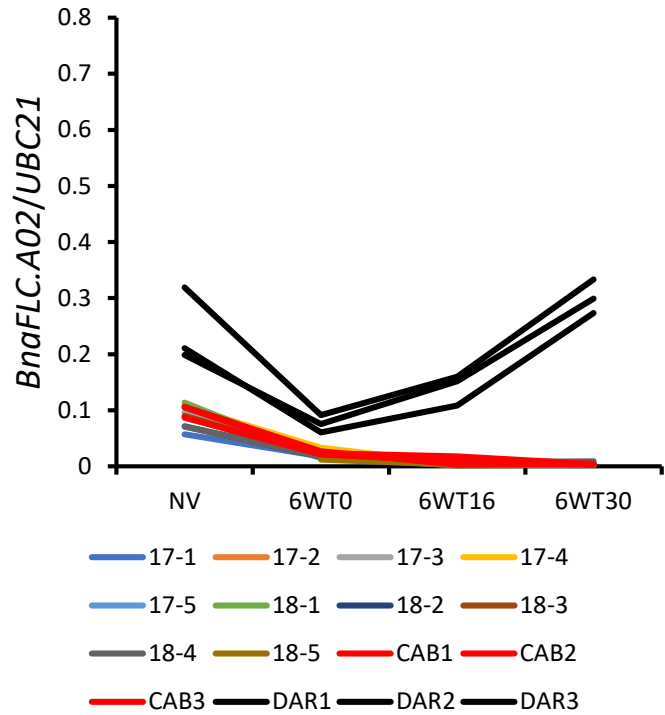

Figure S7

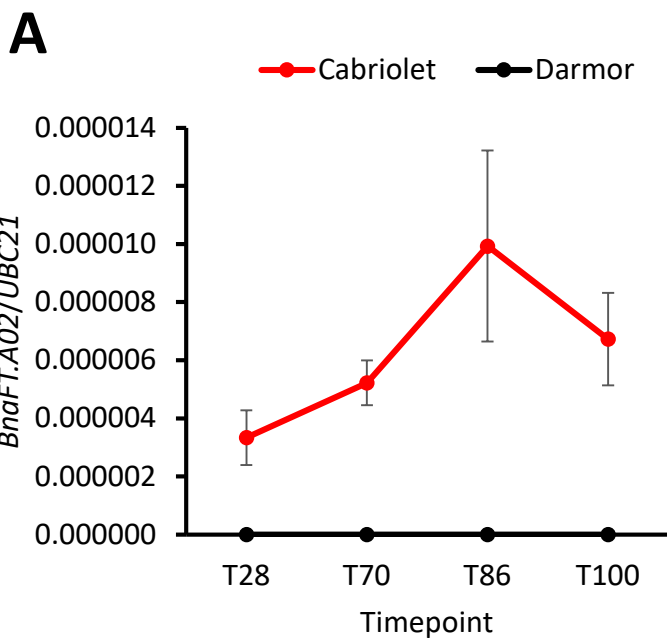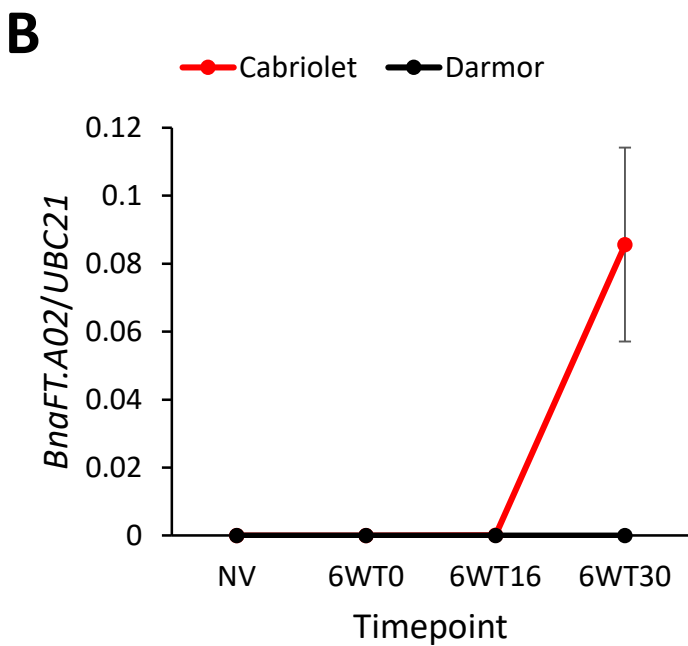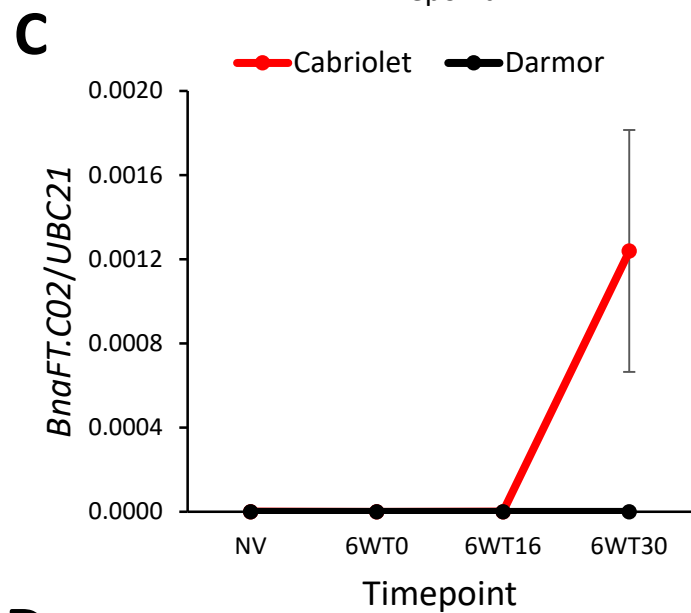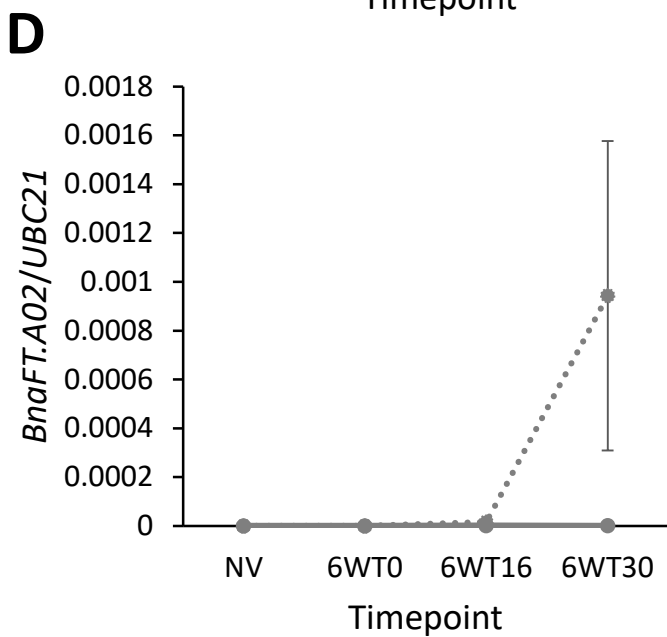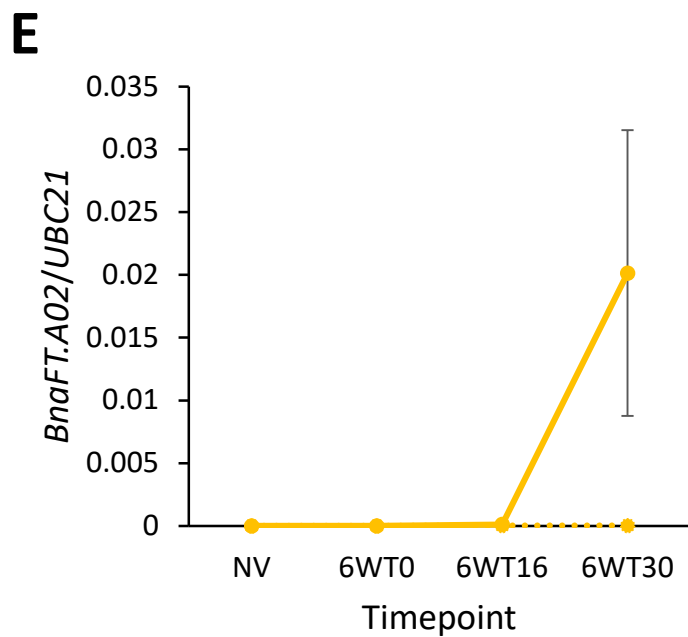

—●—  $BnaFLC.A02-Dar:BnaFT.A02-Dar$

····●····  $BnaFLC.A02-Cab:BnaFT.A02-Dar$

····●····  $BnaFLC.A02-Dar:BnaFT.A02-Cab$

—●—  $BnaFLC.A02-Cab:BnaFT.A02-Cab$

# Figure S8

Percentage of genomic positions with adequate sequence read depth coverage

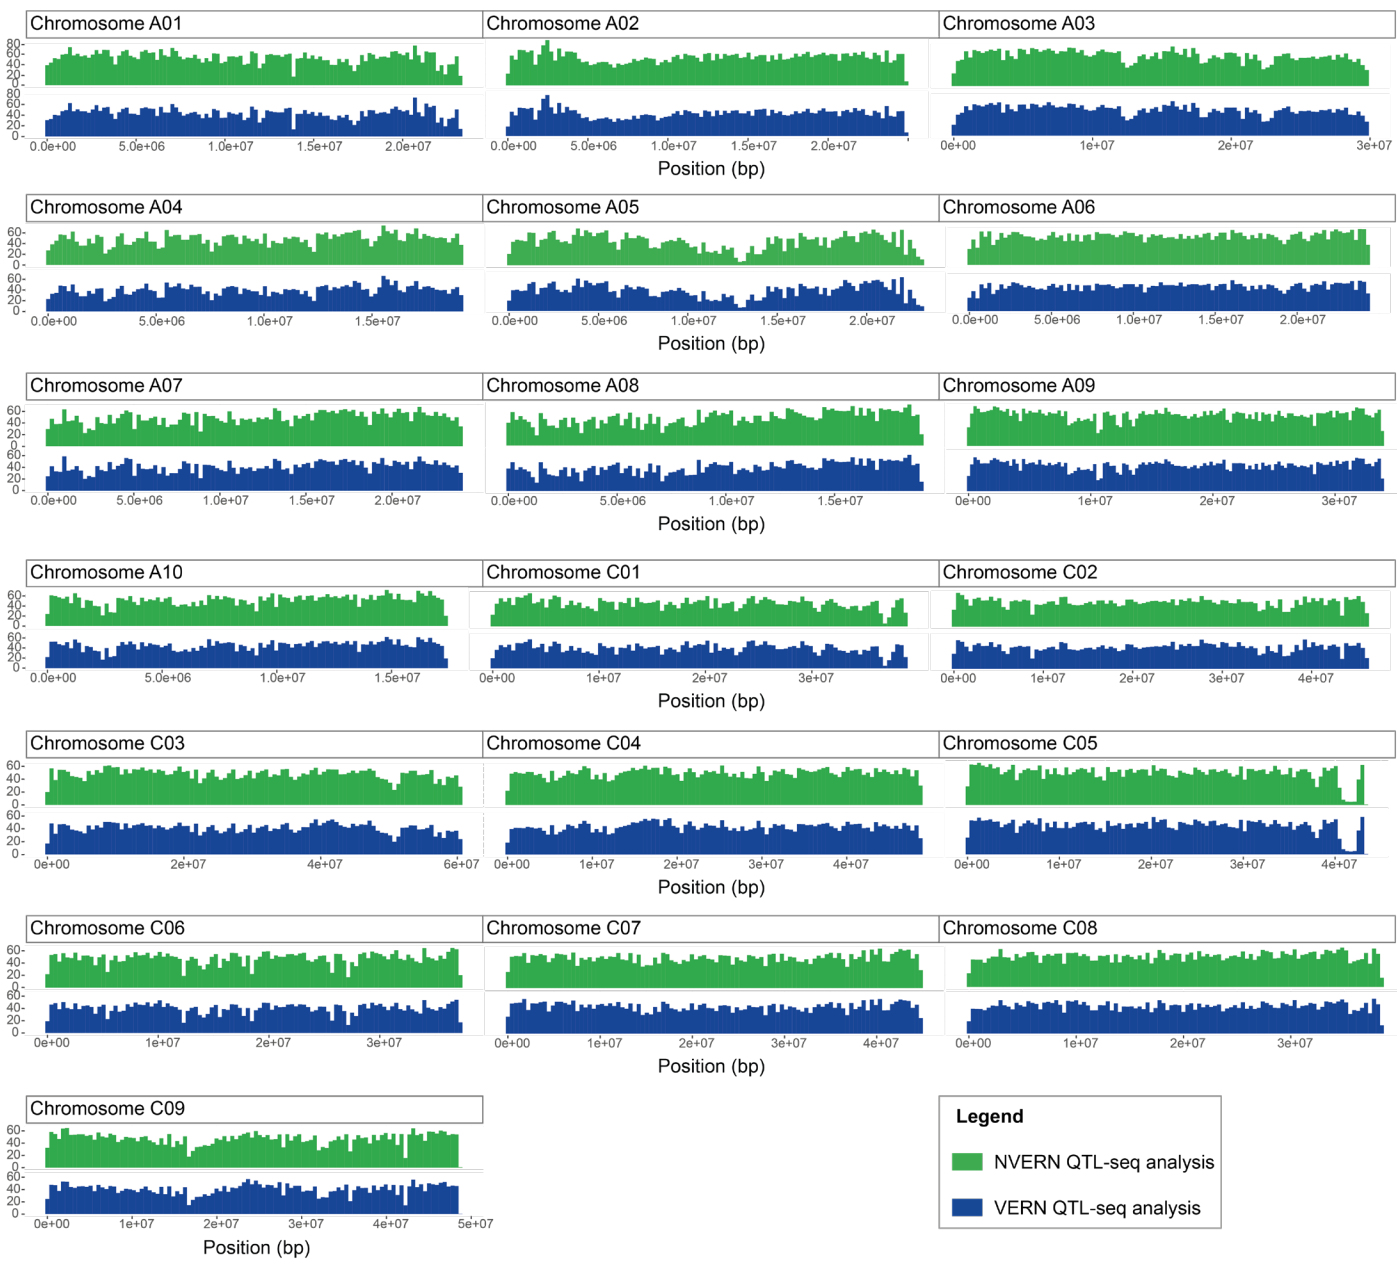

Supplement: PBI-18-2466-s001.pdf [file PBI-18-2466-s001.pdf]
